1 Effect of Midwife-Led Pelvic Floor Muscle Training on Prolapse Symptoms and Quality of Life  
2 in Women with Pelvic Organ Prolapse in Ethiopia: A Cluster-Randomized Controlled Trial

3  
4 Melese Siyoum (MS)<sup>1,2\*</sup>, Rahel Nardos (RN)<sup>3</sup>, Biniyam Sirak (BS)<sup>4</sup>, Theresa Spitznagle (TS)<sup>5,6</sup>,  
5 Wondwosen Teklesilasie (WT)<sup>2</sup>, Ayalew Astatkie (AA)<sup>2</sup>

6  
7 <sup>1</sup>Department of Midwifery, College of Medicine and Health Sciences, Hawassa University,  
8 Hawassa, Ethiopia

9 <sup>2</sup>School of Public Health, College of Medicine and Health Sciences, Hawassa University,  
10 Hawassa, Ethiopia

11 <sup>3</sup>Department of Obstetrics and Gynecology, and Women's Health, University of Minnesota, USA

12 <sup>4</sup>Addis Ababa Fistula Hospital, Ethiopia

13 <sup>5</sup>Program in Physical Therapy, Washington University in St Louis, USA

14 <sup>6</sup>Worldwide Fistula Fund, USA

15

16

17

18 **\*Corresponding Author**

19 Melese Siyoum

20 Email: [melesesiyoum755@gmail.com](mailto:melesesiyoum755@gmail.com)

21

22 **Source of funding:** University of Minnesota, worldwide Fistula Fund and Maternal Health

## 23 **Abstract**

24 **Background:** Pelvic organ prolapse (POP) is a common condition that can significantly impact a  
25 woman's quality of life. Pelvic floor muscle training (PFMT) is recommended as a first-line  
26 conservative treatment for prolapse, but evidence on its effectiveness from low-resource settings  
27 is limited. This study aimed to assess the effect of midwife-led pelvic floor muscle training on  
28 prolapse symptoms and health-related quality of life (HRQoL) among women with mild to  
29 moderate pelvic organ prolapse in Ethiopia.

30 **Methods and Findings:** A community-based, parallel-groups, two-arm cluster-randomized  
31 controlled trial was conducted in Dale and Wonsho districts of Sidama Region, Ethiopia. Women  
32 with symptomatic POP stages I-III were randomized by cluster to receive either midwife-led  
33 PFMT plus lifestyle counseling (intervention group) or lifestyle counseling alone (control  
34 group). The participants and counsellors knew what the women were receiving but they were not  
35 aware of the other group. The outcome assessors, who collected data at the end of intervention,  
36 were blinded to the participants' treatment allocation. The primary outcomes were changes in  
37 prolapse symptom score (POP-SS) and prolapse quality of life (P-QoL). Mixed-effects  
38 generalized linear model was used to determine the effect of PFMT on prolapse symptoms and  
39 P-QoL at 99% confidence level. Adjusted  $\beta$  coefficients were used as effect measures. The level  
40 of significance was adjusted for multiple comparisons.

41 A total of 187 women were randomized to intervention (n=86) from 4 clusters and control  
42 (n=101) arms from another four clusters. At sixth months, the intervention group showed  
43 significantly greater improvements both in prolapse symptoms and P-QoL. The mean change  
44 difference in POP-SS was -4.11 (99% CI [-5.38, -2.83];  $p < 0.001$ ). Similarly, the mean change  
45 difference was: -8.86 (99% CI [-13.84, -3.89];  $p < 0.001$ ) in physical domain of P-QoL; -11.18  
46 (99% CI [-15.03, -7.32];  $p < 0.001$ ) in psychological domain of P-QoL, and -9.01 (99% CI [-  
47 10.49, -5.54];  $p < 0.001$ ) in personal relationship domain of P-QoL. A significantly higher  
48 proportion (83.72%) of women in the intervention group perceived their condition as "better"  
49 after the intervention as compared to 41.58% in the control group. Women with earlier stages of  
50 prolapse (stage I and II) experienced higher benefits compared to those in stage III.

51 **Conclusions:** A midwife-led PFMT combined with lifestyle counseling significantly improves  
52 prolapse symptoms and quality of life in mild to moderate POP. This strategy can be integrated

53 into the existing maternal and reproductive health programs to address POP in low-income  
54 settings where access to trained specialist is limited.

55 **Trial registration:** Pan African Clinical Trial Registry (PACTR202302505126575).

56 **Keywords:** Pelvic organ prolapse, pelvic floor muscle training, cluster-randomized trial, quality  
57 of life, Ethiopia.

58

## 59 **Author Summary**

### 60 **Why Was This Study Done?**

- 61 • Pelvic organ prolapse (POP) is a prevalent condition that can severely impact women's  
62 quality of life, particularly in low-resource settings where access to specialized care is  
63 limited.
- 64 • Prior to this research, there was limited evidence regarding the effectiveness of pelvic  
65 floor muscle training (PFMT) as a conservative treatment option for POP in such  
66 contexts, highlighting the need for effective interventions.

### 67 **What Did the Researchers Do and Find?**

- 68 • The study utilized a cluster-randomized controlled trial design involving eight clusters  
69 (four clusters in each arm) and a total of 187 women, all drawn from these clusters, with  
70 mild to moderate pelvic organ prolapse (POP) in Sidama region, Ethiopia. The  
71 intervention group received midwife-led pelvic floor muscle training (PFMT) combined  
72 with lifestyle counseling, while the other group received only lifestyle counseling.
- 73 • The key findings from the study showed that women who participated in the midwife-led  
74 pelvic floor muscle training (PFMT) combined with lifestyle counseling experienced a  
75 significant reduction in their pelvic organ prolapse (POP) symptoms. Specifically, there  
76 was an average decrease of 4.11 points in their symptom scores, which indicates a  
77 notable improvement in how they felt. Additionally, the women reported substantial  
78 enhancements in various aspects of their quality of life, meaning they felt better overall  
79 and were able to engage more fully in daily activities

### 80 **What Do These Findings Mean?**

- 81 • The research demonstrates that midwife-led PFMT can serve as an effective first-line  
82 treatment for POP, improving symptoms and quality of life in low-resource settings.
- 83 • However, limitations include reliance on self-reported data, and a relatively short follow-  
84 up period may limit generalizability of the findings.

85

## 86 **Introduction**

87 Symptomatic pelvic organ prolapse (POP) is the descent of one or more of the uterus, cervix,  
88 anterior or posterior vaginal wall, or the vaginal apex from its normal position. This descent can  
89 be caused by deficient pelvic fascia, or weakness in the ligaments or muscles that support the  
90 pelvic organs [1]. These structures can be affected by several risk factors including aging,  
91 vaginal childbirth, chronic constipation, hereditary connective tissue weakness, persistent  
92 elevated intra-abdominal pressure (IAP), menopause, and heavy lifting [2].

93 Pelvic organ prolapse (POP) is a prevalent condition affecting many women globally, with  
94 estimated prevalence rates varying widely from 1% to 65% [3, 4]. This broad range can be  
95 attributed to the challenges in accurately estimating prevalence, largely due to the differing  
96 methodologies employed in various studies. For instance, researchers may utilize a variety of  
97 symptom questionnaires and clinical examination techniques, leading to inconsistencies in the  
98 reported prevalence [3, 5].

99 Women with symptomatic POP present with a range of prolapse-related symptoms that are  
100 associated with the urinary, sexual, and anorectal symptoms [6]. It is evidenced that depressive  
101 symptoms and sexual function disorders are frequently associated with POP [7, 8]. In addition to  
102 disrupting daily functioning, these multifaceted symptoms of POP have significant negative  
103 impact on patients overall quality of life, body image and sexual function [8]. The severity of  
104 symptoms is directly related to the degree of prolapse. As the prolapse descends closer to or  
105 beyond the hymen, the symptoms become more frequent and bothersome [9, 10].

106 The current POP treatment options are either surgery or conservative managements approaches  
107 [11]. The conservative management options include pelvic floor muscle training (PFMT),  
108 pessary, life style modification, or watchful waiting, which are recommended as first-line options  
109 if the prolapse is not the indication for corrective surgery [2]. Conservative management has the  
110 advantage of causing fewer adverse effects and complications [12]. The existing evidence shows  
111 that PFMT has positive effect on prolapse symptom and severity [13]. Due to its effectiveness  
112 and safety, PFMT is indicated as a first-line treatment for women with mild to moderate POP  
113 [13]. PFMT improves prolapse symptoms by improving pelvic muscle strength, endurance,  
114 power, relaxation and combination of these parameters [1].

115 Awareness of POP and conservative treatment option is very poor among women [14] and  
116 healthcare professionals [15] even in high-income countries. To enhance the accessibility and  
117 variety of service for women, it is essential to understand various models of service delivery  
118 [16]. In low- and middle-income countries, evidence about the feasibility and effect of PFMT on  
119 prolapse symptoms and health-related quality of life (HRQoL) is limited.

120 In Ethiopia, there is scarcity of evidence on the effectiveness of PFMT, and women often seek  
121 healthcare only at advanced stages of prolapse [17] when impact of PFMT may be limited.  
122 Additionally, the number of trained specialists such as urogynecologists or physical therapist are  
123 limited in Ethiopia. There are only 450 gynecologists registered in the Ethiopian Society of  
124 Obstetricians and Gynecologists out of which only 15 are urogynecologists and 13 are  
125 urogynecology fellows in 2021 [18]. In areas of the world with developed physical therapy  
126 training (PT) programs, (PT) management of pelvic organ prolapse is the gold standard for  
127 administering the service [19]. However, it is considered a sub-specialty within the profession  
128 and currently the Ethiopian Ministry of Health does not support specialty practice for the  
129 profession of Physical Therapy [20]. Fortunately, midwives, who are generally more accessible  
130 than specialists [21], are capable of learning how to deliver PFMT services and are well-  
131 positioned to provide this support to women in their communities. To address these challenges  
132 and improve access to the conservative management options, research into different models of  
133 PFMT service delivery is critical particularly in low resource settings.

134 The aim of this study was to assess the effect of PFMT provided by trained midwives on  
135 prolapse symptoms and HRQoL among women with mild to moderate POP (stage I-III) in  
136 Sidama region, Ethiopia. Our hypothesis was that providing midwife-led PFMT approximately  
137 monthly alongside three times per-day home-based exercise by participants for six months will  
138 improve prolapse symptoms and prolapse related quality of life.

139

140

141

142

## 143 **Methodology**

### 144 **The Consolidated Standards of Reporting Trials (CONSORT) Checklist**

145  
146 The CONSORT (Consolidated Standards of Reporting Trials) 2010 statement [22] was used to  
147 guide the reporting of this cRCT. The CONSORT checklist consists of a 25-item checklist that  
148 focuses on the key elements for reporting the design, conduct, analysis, and interpretation of  
149 RCTs. An extension to the CONSORT statement for reporting cluster randomized trials (cRCTs)  
150 [23] was also consulted. We have addressed all applicable items from the CONSORT checklist in  
151 the reporting of this cRCT (Supplementary File 1).

152

### 153 **Study design and participants**

154 A community-based, parallel-groups, two-arm, cluster-randomized controlled trial (cRCT) was  
155 conducted among women with symptomatic POP stages I-III in D-W HDSS. First, a baseline  
156 survey was conducted to determine the burden and risk factors of POP and to identify eligible  
157 cases [24]. Women aged over 18 years with at least one symptom of POP, confirmed as stages I-  
158 III using the standard POP-Q measure [25], were included in the study. The identified cases were  
159 then randomized by community clusters into intervention and control arms. Cluster  
160 randomization was preferred to minimize spillover of the intervention to the control arm and due  
161 to the feasibility of providing the intervention at group level (nearby health facility). The clusters  
162 were *kebeles* which are the smallest administrative units in Ethiopia, similar to neighborhoods or  
163 wards. They have a wide range of population sizes, from 500 to several thousand residents [26].  
164 The surface area of *kebeles* varies depending on their location and population density, with those  
165 in densely populated urban areas being smaller compared to rural *kebeles*. Each *kebele* is further  
166 divided into smaller units called *gots* or *villages*. *Kebele* administrations are responsible for  
167 providing basic services, such as health, education, and infrastructure, to their residents. They  
168 also play a crucial role in population-based surveys and research studies in Ethiopia, often  
169 serving as the primary sampling units [27, 28]. *Kebeles* are organized into larger  
170 administrative divisions known as *woredas* (Districts).

171 Sample size calculations were performed using Open-Epi version 3.1, based on the following  
172 assumptions: a 99% confidence level, 80% power, an exposed-to-unexposed ratio of 1, a POP-SS  
173 mean difference of 3.16 with a standard deviation of 4.78 in the intervention group, and a mean  
174 difference of 0.12 with a standard deviation of 3.86 in the control group over six months [15].  
175 This calculation yielded a required sample size of 96, adjusted for an anticipated 16% refusal and  
176 loss to follow-up [15], resulting in an individual-based total sample size of 111.34. This sample  
177 size was utilized for all outcomes since we were unable to determine the effect of pelvic floor  
178 muscle training (PFMT) on quality of life as measured by the Prolapse Quality of Life  
179 Questionnaire. The decision to adjust the confidence level to 99% was based on the adjusted  
180 level of significance to 0.0125 than the usual P-value of 0.05 to account for multiple  
181 comparisons across various outcomes (POP-SS and three distinct domains of P-QoL).

182 To determine the minimum number of clusters required, the individual-based sample size was  
183 multiplied by the intra-cluster correlation coefficient (ICC). Since there was no reported ICC  
184 from earlier studies, we used an ICC of 0.03, which was suggested as estimated fairly typical  
185 value of the Intra-Cluster Correlation (ICC) [29, 30]. This calculation indicated a need for 1.67  
186 clusters per arm. To ensure adequate power [31, 32], a total of eight clusters were selected  
187 randomly from the 12 available clusters in the D-W HDSS.

188 After adjusting for cluster effects with a variance inflation factor (VIF) of 1.39, the total effective  
189 sample size increased to 155, resulting in an expected average of 19.4 participants per cluster.  
190 However, during enrollment, a slightly varying number of eligible cases was identified in each  
191 cluster. Excluding additional participants was deemed unethical, and alternative treatment  
192 options could not be provided due to the cRCT design. Furthermore, it was believed that  
193 including all eligible cases would be manageable and enhance the study's power [29, 30].  
194 Consequently, all eligible cases were included, raising the total sample size from 155 to 187  
195 participants. The exclusion criteria were: women who were diagnosed to have symptomatic POP  
196 stage I-III but planned to leave the study area within six months (study period), severely ill  
197 women, women with psychiatry disorders, women with delivered myoma, or women who want  
198 to have prolapse surgery within six months.

199



## 200 **Randomization and Masking**

201 The study site, D-W HDSS, comprises eight kebeles from Dale district and four kebeles from  
202 Wonsho district. These were stratified into two strata based on their geographical location (Dale  
203 and Wonsho districts). Stratifying on location reduces stratum variability and helps to ensure that  
204 they are balanced across study arms [31, 32]. To improve similarity across treatment and control  
205 groups, a balanced number of clusters from each stratum were assigned to each arm. First all  
206 eligible clusters in each district were listed and assigned a unique identifier number. Then, a  
207 lottery method was used to select two of four clusters from Wonsho district and randomly  
208 assigned to each arm. Similarly, six of eight clusters from Dale districts were selected and three  
209 clusters were assigned to each arm randomly by lottery method. Then, 102 households were  
210 selected from each cluster using computer-generated random numbers (based on the list of their  
211 house numbers) to identify eligible women. One woman (usually head of the household) was  
212 recruited for the study.

213 To reduce the risk of spillover-effect of the intervention, the interventional and control clusters  
214 were separated by a buffer zone [31], and when it is impossible due to the limited number of  
215 clusters in the D-W HDSS, adjacent clusters were assigned to the same arm. Finally, all eligible  
216 study participants from each cluster identified during the baseline survey were included in the  
217 study (Figure 1).

218 *Figure 1: Randomization and Sampling procedure used to assess the effect of pelvic floor muscle*  
219 *training on prolapse symptoms and quality of life in Sidama Region, Ethiopia, August 2024.*

220  
221 The enrollment period was open for eight months from 13 March to 28 October 2023. Each  
222 participant was followed for six months after enrollment. The last participants were enrolled on  
223 October 28, 2023 so the final follow-up visit was on April 27, 2024. Allocation concealment was  
224 conducted by staff of D-W HDSS at Hawassa University. To ensure unbiased allocation, the  
225 lottery method was performed by an independent researcher who was not involved in the  
226 recruitment, intervention, or outcome assessment processes. Two staff members of Yirgalem  
227 Hamline Fistula center, who performed pelvic examination to determine POP stage, recruited  
228 eligible participants for intervention.

229 The participants in the intervention group were aware that they were receiving the PFMT  
230 program but they were not aware of the control group. Similarly, the control group knew that  
231 they are receiving life style counselling but they are not aware of the intervention group. The  
232 same is true for the healthcare providers delivering the counselling. Moreover, the outcome  
233 assessors, who collected data at the end of intervention, were blinded to the participants’  
234 treatment allocation.

235

## 236 **Procedure**

237 In Ethiopia, each kebele/cluster is served by its own health post, staffed by health extension  
238 workers. Additionally, groups of five or more kebeles are supported by a single health center,  
239 staffed by formally trained healthcare professionals, including midwives. For this study, the  
240 intervention was implemented at eight distinct health centers. The intervention was implemented  
241 at health centers due to their capacity to deliver the training and their geographical accessibility  
242 to participants, especially when compared to hospitals.. In this study area, all health centers have  
243 at least three degree-holding midwives responsible for providing antenatal, delivery, and  
244 postnatal care. Each health center is equipped with various rooms, including delivery rooms,  
245 cervical cancer screening rooms, and outpatient rooms, which are suitable for conducting the  
246 Pelvic Organ Prolapse Quantification (POP-Q) [25] assessments and ensuring confidentiality  
247 during individual counseling sessions.

248 From each selected health facility, two female midwives were trained either on pelvic floor  
249 muscle training and how to counsel patients, or only on how to counsel for life style modification  
250 based on their pre-allocated health facility. The training that included education on theory,  
251 simulation, and video aids was given by a fellowship trained urogynaecologist. Then, the trained  
252 midwives administered the intervention to the women assigned in the intervention arms.

253 Women who were assigned to intervention received pelvic floor muscle training and prolapse  
254 lifestyle advice focusing on risk factors for POP such as constipation, chronic coughing, heavy  
255 lifting, and other medical conditions. The control group received only lifestyle modification. In  
256 the interventional group, the pelvic examiners link eligible women to the assigned midwife with  
257 the POP-Q findings. Then, at the initial visit, women were informed by midwives about the stage

258 of POP they had and type of prolapse (anterior, posterior, or central) which was explained in a  
259 private room. Then the advantage of pelvic floor muscle exercise, and how it works, the detail of  
260 the exercise and follow-up schedule were explained in detail at group level in a private room for  
261 40-60 minutes.

262  
263 They were trained to sit or lie comfortably, train pelvic muscles with 10 times 10-second  
264 maximum holds, and 10 fast contractions [15, 33]. They were instructed to repeat this at least  
265 three times per day (morning, afternoon, and night) [15, 34]. Women were taught how to  
266 precontract the pelvic floor muscles against increases in intra-abdominal pressure (Knack  
267 exercise). They were trained to exercise 10 long squeezes and lift  
268 contractions, each held for 10 seconds, allowing time between the squeeze to relax and lower the  
269 muscle for up to 5 seconds. The long squeezes were followed by 10 short squeezes. Women were  
270 advised to try to feel the releasing and relaxing of the squeeze after 10 short squeezes, and  
271 finally, to do a squeeze with a light cough for 10 times. The long squeezes were for 10 seconds  
272 each and the 10 quick squeezes for 1-2 seconds each.

273 To help participants correctly identify and contract their pelvic floor muscles, the participants in  
274 the intervention group received pelvic floor muscle training with internal digital biofeedback  
275 administered by the trained midwives. During the individual training sessions, midwives used  
276 various verbal cues and analogies. For example, participants were instructed to “imagine you are  
277 trying to stop the flow of urine or hold back gas. Squeeze as though you are trying to slow down  
278 or stop your urine mid-stream” [35]. This relevant analogy helped participants visualize the  
279 specific action they needed to perform. Throughout the exercises, midwives provided descriptive  
280 feedback to guide participants. They would say things like, “As you squeeze, focus on lifting the  
281 muscles around your vagina and anus upwards. You should feel a tightening and lifting  
282 sensation” [33, 35, 36]. This encouraged participants to be aware of the specific muscles being  
283 engaged during the contractions. We translated the Lifestyle Advice Leaflet from the POPPY  
284 trial [15] into Sidaamu Afoo, the local language, to enhance understanding and effectiveness  
285 during counseling sessions.

286 They were appointed to attend five visits (at weeks 0, 2, 6, 10, and 15) at a nearby health facility.  
287 The appointment frequency was adapted from the United Kingdom National Health Service

288 (NHS) [37]. Initial appointments were scheduled closely together to reinforce correct exercise  
289 techniques and ensure participants fully understood all the advice provided. Subsequently,  
290 appointments were spaced further apart to promote independent home exercise. A 15-weeks  
291 intensive training was recommended to get adequate muscle strength [38]. The change in  
292 prolapse symptoms and health related quality of life were analyzed at six months.

293 A life style counselling was given for both arms focusing on the following points [15, 36].

294 ***Bowel Health:*** To avoid constipation, which increases strain on pelvic floor muscles and can  
295 exacerbate prolapse symptoms, it's important to consume a balanced diet rich in fruits,  
296 vegetables, and adequate fiber. Aim for 1.5 to 2 liters of water daily to maintain bowel regularity.  
297 When using the toilet, sit fully rather than hovering, as this promotes muscle relaxation. Position  
298 yourself comfortably with your feet apart and hands resting on your thighs or supported. Keep  
299 your abdominal muscles relaxed; if you need to bear down, take a deep breath to ease tension.  
300 Light pressure on the vaginal bulge towards the back passage may assist with complete bowel  
301 emptying.

302 ***Bladder Health:*** It's crucial to urinate only when the bladder signals the need, rather than going  
303 "just in case." Sitting fully on the toilet aids in muscle relaxation, and leaning forward slightly  
304 after urination can help ensure complete bladder emptying. Avoid straining, as this can worsen  
305 prolapse symptoms. Maintaining the recommended fluid intake of 1.5 to 2 liters per day is  
306 essential; reducing fluids does not necessarily decrease urinary frequency and may lead to  
307 bladder issues.

308 ***Weight Management:*** Maintaining a healthy weight is vital, as excess weight can place  
309 additional pressure on the pelvic floor. Weight loss may improve prolapse symptoms.

310 ***Reducing Intra-abdominal Pressure:*** For those with a chronic cough, follow prescribed  
311 treatments and stay hydrated to prevent strain from coughing. Proper lifting techniques are also  
312 important; adopt good habits even for lighter items, tightening pelvic floor muscles before  
313 lifting. When lifting heavy loads, divide the weight and lift from low positions to minimize  
314 strain.

315 ***Exercise and Physical Activity:*** It is advisable to avoid activities that worsen symptoms, such as  
316 prolonged standing. Try to alternate standing tasks with sitting breaks. Additionally, high-impact

317 exercises, like jumping, jogging, or aerobics that involve both feet leaving the ground  
318 simultaneously, should be avoided. Instead, opt for low-impact activities like modified aerobics,  
319 cycling, using an elliptical trainer, or brisk walking.

320

## 321 **Outcomes**

322 Our primary outcomes were pelvic organ prolapse symptoms and health-related quality of life  
323 (HRQoL). The POP-SS was measured by the *Sidaamu Afoo* version of the pelvic organ prolapse  
324 symptom score (POP-SS) questionnaire [39]. The psychometric properties of the questionnaire  
325 have been evaluated in the same setting and found to have acceptable reliability and validity. It is  
326 a patient reported-outcome measure that contain seven items with five Likert-scale ranging from  
327 0 to 4, with a possible total score of 0 to 28 (the higher score representing worse symptom) [40].  
328 Health-related quality of life was measured by using the prolapse quality of life (P-QoL)  
329 questionnaire translated from the Amharic version [41]. While the original version has 20 items  
330 with nine domains [42], in a previous work designed to adapt the P-QoL locally (*to Amharic*  
331 *version*), the dimensions have been condensed into three: physical function (including General  
332 health perception (GHP), prolapse impact (PI), role (RL), physical (PL) and social limitation  
333 (SL), and severity measures (SM)); psychological function (including emotional disturbances  
334 (EMO) and sleep/energy disturbances (SE)); and personal relationships ((PR). Each domain is  
335 related to a particular aspect of QoL, and scores in each domain range from 0 to 100, the higher  
336 score indicating poor quality of life. This tool has previously been validated in a similar context  
337 (northern Ethiopia).

338 The secondary outcome, women's perceived change In prolapse, was evaluated using the patient  
339 global impression of change index (PGI-I), a seven-point Likert scale (1 = very much better to 7  
340 = very much worse) [43]. In this study, patients were classified as improved if they scored 1, 2,  
341 or 3 on the PGI-I scale, no change if they scored 4 and worse if they scored 5, 6 or 7.

342 Intervention adherence was measured in terms of attendance at appointments [15] and the  
343 amount of exercise women reported at follow-up time. Women's adherence to training protocol  
344 is considered adequate when they complete at least 80% of the training sessions given by  
345 midwives [44].

346 The details of the baseline data collection procedures and tools have been published elsewhere  
347 [24]. All tools were translated from English and Amharic into the local language (*Sidaamu Afoo*).

348 The baseline data about sociodemographic characteristics and prolapse symptoms were collected  
349 through face-to-face interview with women at their home by eight first degree nurses using  
350 electronic data collection forms prepared using Kobo tool box. The women were subsequently  
351 invited for pelvic examination in a nearby health center to confirm their prolapse status and  
352 degree of prolapse by using the POP-Q [25]. The POP-Q was performed by staff members of  
353 Yirgalem Hamlin Fistula Center who have special training on Fistula and POP identification.  
354 Then women with symptomatic POP stages I-III were interviewed how much the prolapse had  
355 affected their quality of life using P-QoL tool. The detail POP-Q procedures and data quality  
356 assurance method was published elsewhere [24].

357 At three months and six months of intervention, four first degree nurses went to the house of the  
358 study participants and collected the data through face-to-face interviews. The data collection tool  
359 included the POP-SS and P-QoL questionnaires used at baseline, PGI-I change and questions  
360 used to assess their adherence to training protocol [44].

361

## 362 **Statistical analysis**

363 All data analyses accounted for the complex sampling design, which included stratification by  
364 district (Dale and Wonsho), clustering by kebele, and weighting for unequal probability of  
365 selection. The weighting variable was the product of cluster and household selection weights,  
366 normalized by dividing each unit's survey weight by the unweighted average of the survey  
367 weights. Categorical variables were summarized as frequencies and percentages, while  
368 continuous variables were summarized using means and standard deviations or medians and  
369 interquartile ranges.

370 The analysis was based on the intention-to-treat principle. In practice, all participants adhered to  
371 their allocated treatment and completed the follow-up as scheduled. Although the intervention  
372 was randomly assigned at the cluster level, outcomes were evaluated at the individual level. An  
373 Individual-level analysis was performed using a mixed-effects generalized linear model

374 (MEGLM), incorporating random effects to account for clustering by health centers and survey  
375 weights to adjust for unequal selection probabilities.

376 To complement the primary analysis, a cluster-level analysis was conducted following Hayes and  
377 Moulton's framework. Cluster-level means were calculated for key outcomes (mean change in  
378 POP-SS, physical domain, psychological domain and personal relationship) and analyzed using  
379 linear regression to compare intervention and control clusters (Supplementary file 5).

380 To compare the primary outcomes at six months, we fitted a multilevel mixed-effects generalized  
381 linear model (MEGLM) to the change from baseline in POP-SS and each domain of HRQoL at  
382 three and six months. The model included fixed effects for treatment group, time, and other  
383 relevant covariates (stage of prolapse, duration of prolapse symptoms, residence, parity, age,  
384 level of education, history of prolonged labor, wealth index, constipation, and chronic cough), as  
385 well as a random intercept for patients within centers and a random slope for time within  
386 patients. The relevance of the covariates was determined based on prior research, clinical aspect,  
387 and their potential impact on the intervention and outcomes (prolapse symptoms and quality of  
388 life). MEGLM was chosen for its flexibility and robustness needed to accurately model the  
389 complex and varied data structures often found in cRCT leading to more reliable and  
390 interpretable results [45].

391 The difference between intervention and control group was estimated by mean change from  
392 baseline at six months. Bonferroni correction for multiple measurement [46] was used to adjust  
393 level of significance to 0.0125 as we measured effect of PFMT on four outcomes (POP-SS and  
394 three domains of HRQoL). Then a mean change difference between the intervention and control  
395 arms was presented with 99% confidence interval and P-values. This adjustment is crucial for  
396 maintaining statistical rigor and minimizing the risk of Type I errors in the analysis [46].

397 To evaluate model fit, we initially fitted a null model for each outcome variable (POP-SS and the  
398 three domains of Prolapse Quality of Life (P-QoL)), incorporating random effects for both  
399 cluster and participant ID. We calculated the intraclass correlation coefficient (ICC) to determine  
400 the proportion of variance in the outcome attributable to the clustering structure, which was  
401 found to be 4% and less in this study. Subsequently, we fitted models that included the  
402 intervention variable to the outcome variables individually. This step allowed us to assess the  
403 impact of the intervention on each outcome. To control for effect of confounders and effect

404 modifiers, for each model with added predictors, we evaluated model fitness using the Pseudo  
405 Log-Likelihood values for model fitness and Adjusted Wald Test for significance of predictors.  
406 Higher (less negative) Pseudo Log-Likelihood values indicate better model fit and significant  
407 Wald test indicates importance of the predictors [47]. This approach allowed us to identify the  
408 most appropriate models for each outcome. Residual analysis was done to assess  
409 homoscedasticity and normality of residuals by using histogram. To check for effect modifiers,  
410 we employed statistical tests to assess interactions between PFMT and potential effect modifiers.  
411 This approach allowed us to determine whether the effect of PFMT varies across different  
412 subgroups. The data set on which the analysis based was provided as a supplementary file 2.

### 413 **Trial Registration**

414 The trial was registered at the Pan African Clinical Trial Registry (<https://pactr.samrc.ac.za>)  
415 database, with the registration number PACTR202302505126575.

416

## 417 **Results**

### 418 **Trial profile**

419 A total of 187 eligible women were randomized to the intervention group (n = 86) or the control  
420 group (101). All of them completed the follow-up and completed the questionnaire at three and  
421 six months. The age of participant ranged from 19 to 80 years with the median of 36 years (IQR:  
422 31–50). All were parous, with a median of 4 childbirths (IQR: 4–6). The median hours of daily  
423 heavy lifting work were 4 hours (IQR: 3–5). The most common stage of prolapse was Stage II  
424 120/187(64.17%). The median duration of feeling prolapse symptom was 48 (30 -60) months  
425 with the minimum of five months and maximum of 20 years. At baseline, a slightly higher  
426 number of women in menopause, family history of prolapse, and history of home birth were  
427 observed in the intervention group. The mean baseline POP-SS and quality of life domain scores  
428 were almost similar across the groups. Almost half 92 (49.2%) of the participants had prolapse of  
429 multiple vaginal compartments; whereby 161 (86.1%) had anterior prolapse, 113 (60.43%) had  
430 posterior prolapse and 28/187 (14.97%) had apical prolapse. Overall, while the intervention and  
431 control arms were balanced in terms of most characteristics at baseline, there were some



432 important characteristics that showed significant imbalances. Detailed sociodemographic  
 433 characteristics are presented in Table 1.

434 **Table 1: Sociodemographic and Clinical Characteristics of Trial Participants at Baseline in**  
 435 **Sidama Region, Ethiopia (August 2024) (n = 187)**

| Variables              | Category            | Control(n=101) | Intervention (n=86) |
|------------------------|---------------------|----------------|---------------------|
| Districts              |                     |                |                     |
| Number of clusters     | Dale                | 3              | 3                   |
|                        | Wonsho              | 1              | 1                   |
| Number of participants | Dale                | 64             | 70                  |
|                        | Wonsho              | 37             | 16                  |
| Clusters               | Aposto              | 21             | -                   |
|                        | Megara              | -              | 26                  |
|                        | Dagia               | -              | 16                  |
|                        | Shoye               | -              | 27                  |
|                        | Wayicho             | 26             | -                   |
|                        | Dansha sire         | 17             | -                   |
|                        | Mamana              | 37             | -                   |
|                        | Bokaso              | -              | 16                  |
| Age at base line       | Median (IQR)        | 34 (30-37)     | 50 (35-60)          |
| Age at first Birth     | Median (IQR)        | 18 (17-19)     | 17 (16-20)          |
| Number of childbirths  | (Median (IQR)       | 4 (4-5)        | 5 (4-7)             |
| Age at last delivery   | Median (IQR)        | 30 (26-32)     | 36 (29-42)          |
| Level of Education     | No formal education | 67 (66.82%)    | 60 (69.47%)         |
|                        | Primary school      | 18 (17.94%)    | 20 (23.16%)         |
|                        | Secondary and above | 15 (15.25%)    | 6 (7.38%)           |
| Occupation             | Employed            | 5 (5.38)       | 5 (5.79%)           |
|                        | Un-employed         | 96 (94.62%)    | 81 (94.21%)         |
| Menopause              | Yes                 | 24 (24.22%)    | 53 (61%)            |
|                        | No                  | 77 (75.78%)    | 34 (39%)            |

|                                            |                    |                  |                 |
|--------------------------------------------|--------------------|------------------|-----------------|
| Experience of prolonged labor              | Yes                | 62 (61%)         | 46 (53.16%)     |
|                                            | No                 | 39 (39%)         | 40 (46.84%)     |
| History of home birth                      | Yes                | 66 (65.47%)      | 63 (73.16%)     |
|                                            | No                 | 35 (34.53%)      | 23 (26.84%)     |
| Family history of prolapse                 | Yes                | 53 (52.47%)      | 8 (9%)          |
|                                            | No                 | 48 (47.53%)      | 78 (91%)        |
| Stage of prolapse                          | Stage 1            | 11 (11.21%)      | 11 (13.16%)     |
|                                            | Stage 2            | 65 (64.57%)      | 55 (64.21%)     |
|                                            | Stage 3            | 24 (24.22%)      | 19 (22.63%)     |
| Body mass index                            | <18.5              | 43 (42.15%)      | 38 (44.74%)     |
|                                            | 18.5 – 24.9        | 55 (54.26%)      | 43 (49.47%)     |
|                                            | >=25               | 4 (3.59%)        | 5 (5.79%)       |
| Type (site) of prolapse                    | Anterior only      | 34 (33.66%)      | 37 (43.02%)     |
|                                            | Posterior only     | 15 (14.85%)      | 10 (11.63%)     |
|                                            | More than one site | 52 (51.49%)      | 39 (45.35%)     |
| Mean Base-line POP-SS                      | Mean, SD           | 12.17 ± (4)      | 13.86 ± (4.4)   |
| <b>Baseline Symptoms</b>                   |                    |                  |                 |
| Protruding mass per vagina                 |                    | 97 (96.04%)      | 82 (95.35)      |
| Vaginal Discomfort/pain                    |                    | 97 (96.04%)      | 83 (96.51%)     |
| Heaviness in the lower abdomen             |                    | 96 (95.05%)      | 77 (89.53%)     |
| Lower back dragging                        |                    | 97 (96.04%)      | 79 (91.86%)     |
| Strain to urinate                          |                    | 85 (84.16%)      | 81 (94.19%)     |
| Difficulty to empty bladder                |                    | 77 (76.24%)      | 81 (94.19%)     |
| Difficulty to empty bowel                  |                    | 73 (72.28%)      | 67 (77.91%)     |
| <b>Prolapse quality of life (baseline)</b> |                    |                  |                 |
| Physical function                          | Median (IQR)       | 40.5 (29.7 - 51) | 43 (35 – 56.7)  |
| Personal relation                          | Median (IQR)       | 44.44 (33 - 55)  | 44.44 (33 - 55) |
| Psychological function                     | Median (IQR)       | 46.69 (33 - 53)  | 40 (33 - 53)    |

436 \**IQR*= *Inter-quartile range*, *SD*=*Standard Deviation*; *POP-SS* = *Pelvic organ prolapse*  
437 *symptoms score*. \*\* *P-values presented with* <sup>¥</sup> *indicate Mann-Whitney U test*, <sup>©</sup> *indicate chi-*  
438 *square test and* <sup>®</sup> *indicate independent t-test*.

#### 439 **Adherence and Follow-up**

440 All study participants adhered strictly to their allocated treatment and completed the follow-up as  
441 scheduled. No participants changed their allocation, missed follow-up appointments, or failed to  
442 complete the treatment regimen. Consequently, while our analysis framework was based on the  
443 intention-to-treat principle, the actual adherence and follow-up were perfect, ensuring that all  
444 participants were analyzed according to their initial allocation.

445

#### 446 **Prolapse Symptoms and Quality of Life at Six Months**

447 A summary at the cluster level reveals that all clusters experienced at least a minimum mean  
448 change of 1 point in the POP-SS score. Notably, a larger change was observed in the intervention  
449 clusters compared to the control clusters, suggesting a more significant impact of the PFMT  
450 intervention on participants in those areas (Table 2).

451

452

453

454

455

456

457

458

459

460

461 **Table 2: Table 1: Change in Pelvic Organ Prolapse Symptom Scores (POP-SS) and Related**  
 462 **Domains by Cluster and Intervention Group**

| Clusters           | Group        | Post intervention | Outcome variables   |                       |                        |                       |
|--------------------|--------------|-------------------|---------------------|-----------------------|------------------------|-----------------------|
|                    |              |                   | POP-SS              | Physical function     | Psychological function | Personal relation     |
| Aposto (n=21)      | Control      | Mean $\pm$ SD     | 11.65 ( $\pm$ 3.79) | 41.20 ( $\pm$ 19)     | 36.25( $\pm$ 12)       | 38.64( $\pm$ 15)      |
|                    |              | Mean difference   | -1.13 ( $\pm$ 2.39) | -3.64 ( $\pm$ 8.78)   | -8.12 ( $\pm$ 12.08)   | -3.86 ( $\pm$ 8.18)   |
| Bokaso (n=16)      | Intervention | Mean $\pm$ SD     | 8.83 ( $\pm$ 4.99)  | 35.33( $\pm$ 14.3)    | 38.35( $\pm$ 12.86)    | 29.63 ( $\pm$ 11.92)  |
|                    |              | Mean difference   | -3.17 ( $\pm$ 2.32) | -11.93 ( $\pm$ 14.24) | -10.00 ( $\pm$ 18.22)  | -13.89 ( $\pm$ 16.61) |
| Dagia (n=16)       | Intervention | Mean $\pm$ SD     | 8.67 ( $\pm$ 5.07)  | 23.55 ( $\pm$ 15.92)  | 26.68( $\pm$ 14.63)    | 29.63( $\pm$ 16.08)   |
|                    |              | Mean difference   | -6.06 ( $\pm$ 3.54) | -19.50 ( $\pm$ 11.60) | -11.49 ( $\pm$ 18.71)  | -16.05 ( $\pm$ 15.22) |
| Dansha Sire (n=17) | Control      | Mean $\pm$ SD     | 12.42 ( $\pm$ 5.40) | 37.37 ( $\pm$ 16.57)  | 35.10( $\pm$ 16.42)    | 38( $\pm$ 19.48)      |
|                    |              | Mean difference   | -1.16 ( $\pm$ 1.82) | -1.42 ( $\pm$ 4.56)   | -3.16 ( $\pm$ 8.02)    | -2.92 ( $\pm$ 7.44)   |
| Mamana (n=37)      | Control      | Mean $\pm$ SD     | 9.93 ( $\pm$ 4.12)  | 39 ( $\pm$ 14.97)     | 35.33( $\pm$ 13.78)    | 39.09( $\pm$ 13.61)   |
|                    |              | Mean difference   | -1.26 ( $\pm$ 2.13) | -14.99 ( $\pm$ 2.56)  | -5.43 ( $\pm$ 56)      | -3.70 ( $\pm$ 6.88)   |
| Megara (n=26)      | Intervention | Mean $\pm$ SD     | 7.62 ( $\pm$ 5.14)  | 23.46 ( $\pm$ 14.28)  | 29.21( $\pm$ 13.23)    | 32.18( $\pm$ 18.28)   |
|                    |              | Mean difference   | -6.0 ( $\pm$ 4)     | -14.99 ( $\pm$ 12.11) | -12.88 ( $\pm$ 15.98)  | -11.88 ( $\pm$ 16.53) |

|                   |              |                 |                     |                       |                       |                       |
|-------------------|--------------|-----------------|---------------------|-----------------------|-----------------------|-----------------------|
| Shoye<br>(n=27)   | Intervention | Mean $\pm$ SD   | 8.8 ( $\pm$ 5.01)   | 33.39 ( $\pm$ 13.77)  | 30.24( $\pm$ 14.49)   | 28.89( $\pm$ 12.68)   |
|                   |              | Mean difference | -5.90 ( $\pm$ 4.77) | -11.61 ( $\pm$ 17.69) | -12.45 ( $\pm$ 13.67) | -11.11 ( $\pm$ 13.52) |
| Wayicho<br>(n=26) | Control      | Mean $\pm$ SD   | 10.41 ( $\pm$ 4.26) | 33.24 ( $\pm$ 21)     | 35.42( $\pm$ 14.43)   | 37.93( $\pm$ 16.98)   |
|                   |              | Mean difference | -1.72 ( $\pm$ 3.20) | -3.72 ( $\pm$ 6.86)   | -8.97 ( $\pm$ 12.00)  | -4.60 ( $\pm$ 11.30)  |

463 *SD=Standard Deviation; POP-SS = Pelvic organ prolapse symptoms score*

464

465 Women in the intervention group reported significant improvements in prolapse symptoms and  
 466 across all domains of prolapse-related quality of life (P-QoL) at six months. In the unadjusted  
 467 model, the most substantial improvement was observed in the psychological function component  
 468 of the P-QoL, with a mean change difference of -11.18 (99% CI [-15.03, -7.32];  $p < 0.001$ ),  
 469 indicating a large effect size. Moreover, a significantly higher number of women in the  
 470 intervention group reported their condition as “better” after the intervention compared to the  
 471 control group. In the control group, more than 27/101 (26%) of women became worse in 6  
 472 months (Table 3).

473 Table 3: Effect of pelvic floor muscle training on prolapse symptom and prolapse quality of life,  
474 Sidama Region, Ethiopia, August 2024.

| Outcome                                                 | After 6months          |                         | Change difference from baseline (mean, 99% CI, P-value) |
|---------------------------------------------------------|------------------------|-------------------------|---------------------------------------------------------|
|                                                         | Intervention (n=86)    | Control (n=101)         |                                                         |
| POP-SS (mean ±SD)                                       | 8.4 (± 5.15)           | 10.8 (± 4.48)           |                                                         |
| Change from baseline (mean ±SD)                         | -5.44 (± 4.03)         | -1.34 (± 2.47)          | - 4.11 (-5.08 -3.14)                                    |
|                                                         | P < 0.001 <sup>b</sup> | P < 0.001 <sup>b</sup>  | P < 0.001 <sup>ψ</sup>                                  |
| <b>Prolapse-Quality of life</b>                         |                        |                         |                                                         |
| Physical function (mean ±SD)                            | 28.89 ± (15.6)         | 38.1 ± (18.1)           |                                                         |
| Change from baseline physical function (mean ±SD)       | -14.2 ± (14.85)        | -2.44 ± (5.68)          | - 11.48 (-15.9, -7.1)                                   |
|                                                         | P < 0.001 <sup>b</sup> | P = 0.0076 <sup>b</sup> | P < 0.001 <sup>ψ</sup>                                  |
| Psychological function (mean, ±SD)                      | 24.96 ± (10.95)        | 35.5 ± (14.33)          |                                                         |
| Change from baseline psychological function (mean, ±SD) | -17.76 ± (17.46)       | -6.52 ± (10.39)         | -11.24 (-16.8, -5.7)                                    |
|                                                         | P < 0.001 <sup>b</sup> | P < 0.001 <sup>b</sup>  | P = 0.01 <sup>ψ</sup>                                   |
| Personal relation (mean, ±SD)                           | 30.17 ± (15.13)        | 38.5 ± (15.89)          |                                                         |
| Change from baseline personal relation (mean, ±SD)      | -12.81 ± (15.80)       | -3.84 ± (8.51)          | -8.97 (-13.9, -4.02)                                    |
|                                                         | P < 0.001 <sup>b</sup> | P < 0.001 <sup>b</sup>  | P < 0.001 <sup>ψ</sup>                                  |
| <b>Perceived improvement after intervention</b>         |                        |                         |                                                         |
| Better                                                  | 72 (83.72%)            | 42 (41.57%)             | 0.0049 <sup>ⓐ</sup>                                     |
| No change                                               | 10 (11.63%)            | 32 (31.68%)             |                                                         |
| Worse                                                   | 4 (4.65%)              | 27 (26.73%)             |                                                         |
| <b>POP-SS at 6<sup>th</sup> months</b>                  |                        |                         |                                                         |
| Protruding mass per vagina                              | 71 (82.56%)            | 100 (99.01%)            | 0.009 <sup>ⓐ</sup>                                      |
| Vaginal discomfort/pain                                 | 69(80.23%)             | 100 (99.01%)            | 0.005 <sup>ⓐ</sup>                                      |
| Heaviness in the lower abdomen                          | 58 (67.44%)            | 93 (92.08%)             | 0.06 <sup>ⓐ</sup>                                       |
| Lower back dragging                                     | 64 (74.42%)            | 95 (94.06%)             | 0.048 <sup>ⓐ</sup>                                      |
| Strain to urinate                                       | 58 (67.44%)            | 81 (80.20%)             | 0.2 <sup>ⓐ</sup>                                        |

|                             |             |             |                   |
|-----------------------------|-------------|-------------|-------------------|
| Difficulty to empty bladder | 58 (67.44%) | 70 (69.31%) | 0.46 <sup>ⓐ</sup> |
| Difficulty to empty bowel   | 46 (53.49%) | 67 (66.34%) | 0.19 <sup>ⓐ</sup> |

475 \*CI= confidence interval; SD=Standard Deviation; POP-SS = Pelvic organ prolapse symptoms  
476 score; n = sample size. \*\* P-values presented with <sup>v</sup> indicate paired t-test, <sup>w</sup> was based on mixed-  
477 effects generalized linear model and <sup>ⓐ</sup> indicate chi-square test.

478

479

### 480 **Effect of covariates on pelvic organ prolapses and quality of life**

481 We observed that women in the stage I and II prolapses experienced more marked improvements  
482 compared to stage III prolapse both in prolapse symptom and quality of life. Women with higher  
483 POP-SS scores, indicating more severe symptoms, experienced less improvement in the physical  
484 domain of quality of life compared to those with lower scores. The analysis showed that as the  
485 severity of prolapse symptoms increased, the associated improvements in the physical domain of  
486 the Prolapse Quality of Life (P-QoL) questionnaire were diminished. Moreover, after adjusting  
487 for the severity of prolapse symptoms and the stage of prolapse, the effect of PFMT on the  
488 physical domain of quality of life was slightly diminished but showed increased effects in the  
489 personal relationship and psychological domains (Table 4).

490

491 Table 4: Adjusted Effect of Pelvic Floor Muscle Training on Prolapse Symptoms and Quality of  
492 Life in Sidama Region, Ethiopia, August 2024.

| Predictors                    | Category            | $\beta$ (crude) | $\beta$ (adjusted) | 99%CI            | P-value |
|-------------------------------|---------------------|-----------------|--------------------|------------------|---------|
| <b>POP-SS</b>                 |                     |                 |                    |                  |         |
| Intervention                  | Mean change         | - 4.11          | -4.11              | -5.38, -2.83     | < 0.001 |
| Stage                         | Stage I             | -5.22           | -4.94              | -7.38, -2.49     | < 0.001 |
|                               | Stage II            | -3.03           | -2.99              | -4.83, -1.13     | < 0.001 |
|                               | Stage III           | Ref             | Ref                |                  |         |
| Symptom duration              |                     | 0.0             | 0.03               | 0.005, 0.06      | =0.002  |
| prolong labor                 |                     | 1.22            | 0.80               | -0.704, 2.30     | =0.17   |
| Education                     | Not educated        | Ref             | Ref                |                  |         |
|                               | Primary school      | -0.5            | -0.15              | -1.77, 1.46      | =0.81   |
|                               | Secondary and above | 0.04            | -0.04              | -2.11, 2.03      | =0.96   |
| <b>Physical Function</b>      |                     |                 |                    |                  |         |
| Intervention effect           | Mean change         | - 11.47         | -8.86              | -13.84, -3.89    | < 0.001 |
| Stage                         | Stage I             | -39             | -34.9              | -42.16, -27.62   | < 0.001 |
|                               | Stage II            | -18.37          | -16                | -22.52, -10.79   | < 0.001 |
|                               | Stage III           | Ref             | Ref                |                  |         |
| Baseline POP-SS               |                     | 1.45            | 0.64               | 0.21, 1.06       | <0.001  |
| <b>Personal relationship</b>  |                     |                 |                    |                  |         |
| Intervention effect           | Mean change         | -8.97           | -9.01              | (-10.49, -5.54)  | < 0.001 |
| Stage of prolapse             | Stage I             | -24.3           | -23.9              | (-29.65, -18.23) | < 0.001 |
|                               | Stage II            | -15.12          | -15.20             | (-20.69, -9.71)  | < 0.001 |
|                               | Stage III           | Ref             | Ref                |                  |         |
| Baseline POP-SS               |                     | 0.83            | 0.23               | (-0.08, 0.55)    | 0.06    |
| <b>Psychological function</b> |                     |                 |                    |                  |         |
| Intervention effect           | Mean change         | -11.24          | -11.18             | (-15.03, -7.32)  | < 0.001 |
| Stage of prolapse             | Stage I             | -18.57          | -16.80             | (-24,34, -9.26)  | < 0.001 |



|                 |           |       |       |               |       |
|-----------------|-----------|-------|-------|---------------|-------|
|                 | Stage II  | -5.53 | -5.13 | (-9.93, 0.32) | 0.006 |
|                 | Stage III | Ref   | Ref   |               |       |
| Baseline POP-SS |           | 0.33  | 0.02  | (-0.43, 0.46) | 0.9   |

493 \*POP-SS = pelvic organ prolapses symptom score, CI= confidence interval, Ref= reference  
 494 category. \*\* The regression table shows a combination of four different regression tables (POP-  
 495 SS and three domains of Prolapse quality of life).

#### 496 Adverse Events

497 No adverse events were observed.

498

#### 499 Discussion

500 This study showed that midwife-led pelvic floor muscle training combined with lifestyle  
 501 counselling significantly improves prolapse symptoms with a mean change difference of -  
 502 4.11(99% CI [-5.38, -2.83]; p < 0.001) in prolapse symptom score and each domain of prolapse-  
 503 quality of life with a mean change difference of -8.86 (99% CI[-13.84, -3.89]; p<0.001) in the  
 504 physical domain, -9.01 (99% CI [-10.49, -5.54]; p <0.001) in the personal relationship domain,  
 505 and -11.18 (99% CI [-15.03, -7.32]; p<0.001) in the psychological domain. A significantly higher  
 506 number of women in the intervention group perceived their condition as “better” since the  
 507 intervention compared to the control group, highlighting the subjective benefit of PFMT. The  
 508 change in POP-SS was more noticeable in women with prolapse stage-I with a mean change  
 509 difference of -4.94 (99% CI [-7.38, -2.49]; p<0.001) and stage II with a mean change difference  
 510 of -2.99 (99% CI [-4.83, -1.13]; p<0.001) as compared to stage III in reducing POP-SS. Similar  
 511 effect was observed on each domain of P-QoL. In addition, severity of baseline prolapse  
 512 symptoms was associated with physical function of the P-QoL domain with a mean change  
 513 difference of 0.64 (99% CI 0.21, 1.01]; p<0.001) compared to minor prolapse symptoms  
 514 indicating that more severe symptoms were linked to less improvement.

515 The results of the present study align with existing literature from developed countries indicating  
 516 the benefit of PFMT for the treatment of POP symptoms and quality of life. A multicenter  
 517 Randomized Controlled Trial (RCT) study from 25 centers (United Kingdom, Dunedin, New  
 518 Zealand and Australia) conducted by Hagen et al. [15] showed that PFMT led to significant

519 reduction in POP symptoms and improved quality of life. A single center RCT and systematic  
520 review of RCT findings also show that PFMT is effective in reducing POP-symptoms, prolapse  
521 stage and quality of life in women with POP-Q stage I-III [4]. Based on the findings of those  
522 studies, the Cochrane reviews [48, 49] and national institute for health and care excellence  
523 (NICE) guidelines [50] recommended PFMT as a first line of treatment for incontinence and  
524 pelvic organ prolapse, to be provided at primary care facilities [51]. Our finding extends these  
525 findings and recommendations to a low-income setting which is of a different cultural and health  
526 care context, highlighting the universal applicability of PFMT across diverse settings. Moreover,  
527 the observed difference in mean change is statistically significant and clinically important as it  
528 exceeded the minimally important change of 1.5 for POP-SS [52]. Again, a remarkable  
529 improvement was reported on “a feeling of vaginal discomfort/pain and protruding mass through  
530 vagina” which are the major indicators for prolapse surgery and regarded as the most crucial  
531 treatment target [53]. The significant reduction in these key symptoms underscores the  
532 importance of PFMT. These two symptoms are closely linked to the physical support provided  
533 by the pelvic floor muscles. Strengthening these muscles through PFMT may lead to a more  
534 noticeable reduction in these specific symptoms compared to others that may be less directly  
535 influenced by muscle strength or may involve more complex physiological changes.

536 The existing evidence shows that the improvement in POP-SS and P-QoL after PFMT can be  
537 attributable to several mechanisms. Overall, PFMT strengthens the pelvic floor muscle,  
538 providing better support for pelvic organs which can reduce/stop degree of prolapse and alleviate  
539 associated symptoms like vaginal bulging, discomfort, and lower back pain [44, 54]. Enhanced  
540 muscle strength also improves urinary and bowel control, reducing symptoms like straining to  
541 urinate and difficulty emptying the bowel [54, 55]. The contraction and relaxation of pelvic floor  
542 muscles during PFMT promote blood flow to the pelvic region and stimulate the nerves in the  
543 area, improving nerve function [56].

544 The study indicates that women with Stage I and II prolapse experience a greater mean change  
545 difference in symptom scores compared to those with Stage III, after adjusting for other factors.  
546 Borello-France and colleagues reported that women with stage II prolapse were better able to  
547 elevate their pelvic floor than those with stage III or IV [57]. Severity of prolapse symptoms was  
548 associated with physical function suggesting that more severe POP-SS causes less improvement.

549 After adjusting for prolapse stage and symptom severity, the effect of PFMT remained significant  
550 with slightly reduced effect on physical function but slightly increased effects on personal  
551 relationship and psychological domains.

552 The findings of this study have important implications for clinical practice and public health  
553 policy in low-resource settings. The first implication is that the result suggest that midwife-led  
554 PFMT can be considered as a first-line conservative treatment for mild to moderate stage of  
555 prolapse in all settings especially in resource limited settings where access to specialized care is  
556 limited. This can be integrated in to the existing maternal and reproductive health programs. The  
557 second implication is that in settings where the number of urogynecologists/pelvic physiotherapy  
558 expert is limited, like the current Ethiopian context, training midwives to deliver PFMT and  
559 lifestyle counseling is feasible and effective to address prolapse symptoms and improve quality  
560 of life among women with POP. We recognize that the most recommended form of PFMT is  
561 supervised training given by a physiotherapist or urogynecologists who have greater in-depth  
562 knowledge [1]. However, this is not feasible in low-resource settings due to shortage of trained  
563 specialists (only less than 28 urogynecologists in Ethiopia). It was evidenced that nurse-delivered  
564 PFMT have comparable effect with those delivered by specialists when implemented properly  
565 [58, 59]. In the present study, the observed mean change difference was relatively larger and the  
566 compliance/adherence to training was better compared to previous studies. This adherence might  
567 be because midwives working in the nearby health facility and the women in the intervention  
568 know each other, and that may create trust and acceptability. This is a nice model that can be  
569 scaled up in other settings including high income countries.

570 This study has its own strength and limitations. Among others, the key strength of the study  
571 includes the rigorous cluster randomized controlled design which enhances the internal validity  
572 of the finding, high adherence rate and complete follow-up which ensure the reliability of the  
573 results. The use of validated and culturally adapted measurement tools ensures the relevance and  
574 accuracy of the collected data, and also the use of a complex survey design, which accounts for  
575 the clustered nature of the data, enhances the potential generalizability of the results to the target  
576 population. Above all, to our knowledge, this study is the first to evaluate effect of PFMT on  
577 prolapse symptoms in Ethiopia.

578 However, some limitations should be considered. The reliance on self-reported adherence to  
579 PFMT and symptom improvement may introduce performance bias since the participants were  
580 not blinded to the intervention. This participants' knowledge of their treatment allocation may  
581 influence their reported outcomes that could lead to higher treatment effect and reported  
582 adherence rate. In addition, the follow-up period was relatively short, which prevents us from  
583 determining whether the observed effects are likely to be sustained over time. During  
584 randomization, we aimed to balance the two groups by allocating similar clusters using stratified  
585 cluster sampling. However, this method cannot account for individual-level variables, which is  
586 an inherent limitation of cluster sampling. As a result, the age of the participant, parity and  
587 family history of the participants were not balanced in this study. The age discrepancy may stem  
588 from inaccuracies in measuring age, as many individuals in rural Ethiopia has no birth  
589 certificates.

590

591

## 592 **Conclusion**

593 Midwife-led pelvic floor muscle training combined with lifestyle counseling significantly  
594 improves prolapse symptoms and quality of life across all domains in women with pelvic organ  
595 prolapse. The observed treatment effects were significant and clinically important. The effects of  
596 PFMT were higher in women with earlier stage of prolapse. Move over, in settings with shortage  
597 of urogynecologists, training midwives to deliver PFMT and lifestyle counselling is a feasible  
598 and effective approach to improve prolapse symptoms and quality of life. Future studies should  
599 incorporate objective measures of adherence and explore long-term effects. Healthcare  
600 organizations should advocate and endorse training of midwives and other healthcare providers  
601 to deliver PFMT.

602

## 603 **Declarations**

## 604 **Ethical Considerations and consent to participate**

605 This study was conducted in accordance with the principles of the Declaration of Helsinki.  
606 Ethical approval was obtained from Institutional Review Board of Hawassa University, College  
607 of Medicine and Health Sciences (Ref. No. IRB/157/14). Written informed consent was obtained  
608 with provisions for participants unable to read and write to sign with their index fingers,  
609 confirming that the consent had been read to them. Given the sensitive nature of the condition,  
610 data regarding self-reported prolapse symptoms were collected in a private location within the  
611 participants' homes. Pelvic examinations were conducted in delivery rooms to ensure  
612 participants' physical privacy, while lifestyle counseling and pelvic floor muscle training took  
613 place in private rooms. All study information was kept confidential, with participants assigned  
614 codes to replace their names and personally identifying information. Access to the key linking  
615 these codes to individual identities was restricted to the principal investigator. The risks to  
616 participants were minimal. While there was potential for psychological distress related to the  
617 pelvic examination, as well as temporary discomfort during physical exams and inconvenience  
618 from follow-up visits, these risks were mitigated by allowing participants to withdraw from the  
619 study at any time during the consent process. The research team provided travel costs and time  
620 compensation, equivalent to approximately four dollars (200 Ethiopian Birr), to the participants.  
621 During baseline data collection, around 26 participants with stage IV prolapse were referred to  
622 the Yirgalem Hamlin Fistula Center for further management. After the study's completion,  
623 women with symptomatic stage III prolapse in the control group linked with the Yirgalem  
624 Hamlin Fistula Center for additional care.

#### 625 **Consent for publication**

626 Not Applicable

#### 627 **Authors contribution**

628 Melese Siyoum: Conceptualization, methodology, fund acquisition, mentorship, formal analysis,  
629 validation, writing original draft, review and editing on final version.

630 Rahel Nardos: Methodology, mentorship, fund acquisition, validation, reviewing and editing the  
631 manuscript

632 Biniyam Sirak: Methodology, fund acquisition, validation, reviewing and editing the manuscript

633 Theresa Spitznagle: Methodology, validation, reviewing and editing the manuscript

634 Wondwosen Teklesilasie: Methodology, validation, reviewing and editing the manuscript

635 Ayalew Astatkie: Conceptualization, methodology, formal analysis, validation, reviewing and  
636 editing the manuscript

637 All authors read and approved the final manuscript

### 638 **Acknowledgment**

639 We would like to thank our sponsors (Hawassa University, University of Minnesota, Worldwide  
640 Fistula Fund, and Maternal Health Fund) for their financial support. The study participants and  
641 data collectors also deserve gratitude. We also thank Dr. Karen Gold and Joseph Kinahan  
642 (Maternal Health Fund), Soja Orłowski (Worldwide Fistula Fund), Katie Brown (University of  
643 Minnesota) and Alemu Tamiso (Hawassa University) for their facilitation in transferring funds.  
644 Yirgalem Hamlin Fistula Center, Health centers in the study area and Mr. Rekiku Fikre (Hawassa  
645 University) deserve acknowledgement for facilitating transportation service support in material.

### 646 **Funding**

647 The payment for data collectors, participant transportation, and field supervisor per-diem was  
648 sponsored by Hawassa University, University of Minnesota, Worldwide Fistula Fund and  
649 Maternal Health Fund. The funders have no role in designing the study, intervention, data  
650 management and publication.

### 651 **Competing of interest**

652 All authors declare that they have no competing of interest

### 653 **Availability of data and materials**

654 The dataset used for this study is available within the manuscript and as supplementary file

655

656

657

658

659 **References**

- 660 1. Bo K, Frawley HC, Haylen BT, Abramov Y, Almeida FG, Berghmans B, et al. An  
661 International Urogynecological Association (IUGA)/International Continence Society (ICS) joint  
662 report on the terminology for the conservative and nonpharmacological management of female  
663 pelvic floor dysfunction. *International urogynecology journal*. 2017;28:191-213.
- 664 2. Bø K, Anglès-Acedo S, Batra A, Brækken IH, Chan YL, Jorge CH, et al. International  
665 urogynecology consultation chapter 3 committee 2; conservative treatment of patient with pelvic  
666 organ prolapse: pelvic floor muscle training. *International urogynecology journal*.  
667 2022;33(10):2633-67.
- 668 3. Hadizadeh-Talasaz Z, Khadivzadeh T, Mohajeri T, Sadeghi M. Worldwide Prevalence of  
669 Pelvic Organ Prolapse: A Systematic Review and Meta-Analysis. *Iranian Journal of Public  
670 Health*. 2024.
- 671 4. Brown HW, Hegde A, Huebner M, Neels H, Barnes HC, Marquini GV, et al. International  
672 urogynecology consultation chapter 1 committee 2: Epidemiology of pelvic organ prolapse:  
673 prevalence, incidence, natural history, and service needs. *International Urogynecology Journal*.  
674 2022:1-15.
- 675 5. Barber MD, Maher C. Epidemiology and outcome assessment of pelvic organ prolapse.  
676 *International urogynecology journal*. 2013;24:1783-90.
- 677 6. Ward RM, Edwards DRV, Edwards T, Giri A, Jerome RN, Wu JM. Genetic epidemiology  
678 of pelvic organ prolapse: a systematic review. *American journal of obstetrics and gynecology*.  
679 2014;211(4):326-35.
- 680 7. Ai F, Deng M, Mao M, Xu T, Zhu L. Depressive symptoms screening in postmenopausal  
681 women with symptomatic pelvic organ prolapse. *Menopause*. 2018;25(3):314-9.

- 682 8. Lowenstein L, Gamble T, Deniseiko Sanses TV, Van Raalte H, Carberry C, Jakus S, et al.  
683 Sexual function is related to body image perception in women with pelvic organ prolapse. The  
684 journal of sexual medicine. 2009;6(8):2286-91.
- 685 9. Ellerkmann RM, Cundiff GW, Melick CF, Nihira MA, Leffler K, Bent AE. Correlation of  
686 symptoms with location and severity of pelvic organ prolapse. American journal of obstetrics and  
687 gynecology. 2001;185(6):1332-8.
- 688 10. Swift SE, Tate SB, Nicholas J. Correlation of symptoms with degree of pelvic organ  
689 support in a general population of women: what is pelvic organ prolapse? American journal of  
690 obstetrics and gynecology. 2003;189(2):372-7.
- 691 11. Aponte MM, Rosenblum N. Repair of pelvic organ prolapse: what is the goal? Current  
692 urology reports. 2014;15:1-5.
- 693 12. Wiegersma M, Panman CM, Hesselink LC, Malmberg AG, Berger MY, Kollen BJ, et al.  
694 Predictors of success for pelvic floor muscle training in pelvic organ prolapse. Physical Therapy.  
695 2019;99(1):109-17.
- 696 13. Giagio S, Innocenti T, Salvioli S, Lami A, Meriggiola MC, Pillastrini P, et al.  
697 Completeness of exercise reporting among randomized controlled trials on pelvic floor muscle  
698 training for women with pelvic organ prolapse: A systematic review. Neurourology and  
699 Urodynamics. 2021;40(6):1424-32.
- 700 14. Abhyankar P, Uny I, Semple K, Wane S, Hagen S, Wilkinson J, et al. Women's  
701 experiences of receiving care for pelvic organ prolapse: a qualitative study. BMC women's  
702 health. 2019;19:1-12.



- 703 15. Hagen S, Stark D, Glazener C, Dickson S, Barry S, Elders A, et al. Individualised pelvic  
704 floor muscle training in women with pelvic organ prolapse (POPPY): a multicentre randomised  
705 controlled trial. *The Lancet*. 2014;383(9919):796-806.
- 706 16. Abhyankar P, Wilkinson J, Berry K, Wane S, Uny I, Aitchison P, et al. Implementing  
707 pelvic floor muscle training for women with pelvic organ prolapse: a realist evaluation of  
708 different delivery models. *BMC Health Services Research*. 2020;20:1-16.
- 709 17. Belayneh T, Gebeyehu A, Adefris M, Rortveit G, Gjerde JL, Ayele TA. Pelvic organ  
710 prolapse surgery and health-related quality of life: a follow-up study. *BMC Women's Health*.  
711 2021;21:1-11.
- 712 18. Workineh ZA, Ayana BA, Gashaye KT, Wubneh SB, Kassie BA. Surgical management  
713 practice of pelvic organ prolapse among Ethiopian gynecologists, 2021: a descriptive study.  
714 *BMC Women's Health*. 2023;23(1):654.
- 715 19. Sung VW, Jeppson P, Madsen A. Nonoperative management of pelvic organ prolapse.  
716 *Obstetrics & Gynecology*. 2023;141(4):724-36.
- 717 20. Footer CB, Tsegaye HS, Yitnagashaw TA, Mekonnen W, Shiferaw TD, Abera E, et al.  
718 Empowering the physiotherapy profession in Ethiopia through leadership development within  
719 the doctoring process. *Frontiers in Public Health*. 2017;5:51.
- 720 21. (FMoHE) TFDRoE. National Health Policy. In: Health, editor. Addis Ababa2024.
- 721 22. Moher D, Hopewell S, Schulz KF, Montori V, Gøtzsche PC, Devereaux PJ, et al.  
722 CONSORT 2010 explanation and elaboration: updated guidelines for reporting parallel group  
723 randomised trials. *Bmj*. 2010;340.
- 724 23. Campbell MK, Piaggio G, Elbourne DR, Altman DG. Consort 2010 statement: extension  
725 to cluster randomised trials. *Bmj*. 2012;345.

- 726 24. Siyoum M, Nardos R, Teklesilasie W, Astatkie A. Prevalence and risk factors of pelvic  
727 organ prolapse among women in Sidama region, Ethiopia: A community-based survey. *Women's*  
728 *Health*. 2024;20:17455057241265078.
- 729 25. Reid F. Assessment of pelvic organ prolapse: a practical guide to the pelvic organ  
730 prolapse quantification. *Obstetrics, Gynaecology & Reproductive Medicine*. 2014;24(6):170-6.
- 731 26. Vértesy L, Lemango TB. Comparison of local governments in Hungary and Ethiopia. *DE*  
732 *IURISPRUDENTIA ET IURE PUBLICO: JOG-ÉS POLITIKATUDOMÁNYI FOLYÓIRAT=*  
733 *JOURNAL OF LEGAL AND POLITICAL SCIENCES*. 2022;13(1-2.):62-75.
- 734 27. Gedefaw AA. Analysis of the contribution of land registration to sustainable land  
735 management in East Gojjam Zone, Ethiopia. *Land*. 2023;12(6):1157.
- 736 28. Nefa SA, Ibrahim AM, Mulushewa SS, Wonga MM, Lee H-Y, Siyum GA, et al. Study  
737 design for the 2019 baseline survey of newly established longitudinal surveillance woredas as the  
738 field lab to serve child health improvement project of Benishangul-Gumuz region, Ethiopia.  
739 *Journal of Global Health Science*. 2019;1(2).
- 740 29. Donner A, Birkett N, Buck C. Randomization by cluster: sample size requirements and  
741 analysis. *American journal of epidemiology*. 1981;114(6):906-14.
- 742 30. Hemming K, Eldridge S, Forbes G, Weijer C, Taljaard M. How to design efficient cluster  
743 randomised trials. *bmj*. 2017;358.
- 744 31. Hayes RJ, Moulton LH. *Cluster randomised trials*: Chapman and Hall/CRC; 2017.
- 745 32. Rutterford C, Copas A, Eldridge S. Methods for sample size determination in cluster  
746 randomized trials. *International journal of epidemiology*. 2015;44(3):1051-67.

- 747 33. Roth SM, Ivey FM, Martel GF, Lemmer JT, Hurlbut DE, Siegel EL, et al. Muscle size  
748 responses to strength training in young and older men and women. *Journal of the American*  
749 *Geriatrics Society*. 2001;49(11):1428-33.
- 750 34. Maxwell M, Berry K, Wane S, Hagen S, McClurg D, Duncan E, et al. Pelvic floor muscle  
751 training for women with pelvic organ prolapse: the PROPEL realist evaluation. *Health Services*  
752 *and Delivery Research*. 2020;8(47).
- 753 35. Hay-Smith J, Bo K, Berghmans B, Hendriks E, de Bie R, van Doorn EvW. Pelvic floor  
754 muscle training for urinary incontinence in women. *The Cochrane database of systematic*  
755 *reviews*. 2008;2008(3).
- 756 36. Maxwell M, Semple K, Wane S, Elders A, Duncan E, Abhyankar P, et al. PROPEL:  
757 implementation of an evidence based pelvic floor muscle training intervention for women with  
758 pelvic organ prolapse: a realist evaluation and outcomes study protocol. *BMC health services*  
759 *research*. 2017;17:1-10.
- 760 37. Women's NCCf, Health Cs. *Urinary incontinence: The management of urinary*  
761 *incontinence in women*. 2006.
- 762 38. Bø K. Pelvic floor muscle exercise for the treatment of stress urinary incontinence: an  
763 exercise physiology perspective. *International Urogynecology Journal*. 1995;6(5):282-91.
- 764 39. Siyoum M, Teklesilasie W, Nardos R, Sirak B, Astatkie A. Reliability and validity of the  
765 Sidaamu Afoo version of the pelvic organ prolapse symptom score questionnaire. *BMC Women's*  
766 *Health*. 2023;23(1):324.
- 767 40. Hagen S, Glazener C, Sinclair L, Stark D, Bugge C. Psychometric properties of the pelvic  
768 organ prolapse symptom score. *BJOG: an International Journal of Obstetrics & Gynaecology*.  
769 2009;116(1):25-31.

- 770 41. Belayneh T, Gebeyehu A, Adefris M, Rortveit G, Genet T. Translation, transcultural  
771 adaptation, reliability and validation of the pelvic organ prolapse quality of life (P-QoL) in  
772 Amharic. *Health and quality of life outcomes*. 2019;17:1-11.
- 773 42. Digesu GA, Khullar V, Cardozo L, Robinson D, Salvatore S. P-QOL: a validated  
774 questionnaire to assess the symptoms and quality of life of women with urogenital prolapse.  
775 *International Urogynecology Journal*. 2005;16:176-81.
- 776 43. Srikrishna S, Robinson D, Cardozo L. Validation of the Patient Global Impression of  
777 Improvement (PGI-I) for urogenital prolapse. *International urogynecology journal*. 2010;21:523-  
778 8.
- 779 44. Brækken IH, Majida M, Engh ME, Bø K. Morphological changes after pelvic floor  
780 muscle training measured by 3-dimensional ultrasonography: a randomized controlled trial.  
781 *Obstetrics & Gynecology*. 2010;115(2 Part 1):317-24.
- 782 45. McCulloch CE, Searle SR, Neuhaus JM. *Generalized, linear, and mixed models*: Wiley  
783 Online Library; 2001.
- 784 46. Bland JM, Altman DG. Multiple significance tests: the Bonferroni method. *Bmj*.  
785 1995;310(6973):170.
- 786 47. Heeringa SG, West BT, Berglund PA. *Applied survey data analysis*: chapman and  
787 hall/CRC; 2017.
- 788 48. Dumoulin C, Hunter KF, Moore K, Bradley CS, Burgio KL, Hagen S, et al. Conservative  
789 management for female urinary incontinence and pelvic organ prolapse review 2013: Summary  
790 of the 5th International Consultation on Incontinence. *Neurourology and urodynamics*.  
791 2016;35(1):15-20.

- 792 49. Hagen S, Stark D. Conservative prevention and management of pelvic organ prolapse in  
793 women. *Cochrane Database of Systematic Reviews*. 2011(12).
- 794 50. National Institute for Health and Care Excellence guideline NG123 N. Urinary  
795 incontinence and pelvic organ prolapse in women: management London 2019 [
- 796 51. Smith A, Bevan D, Douglas HR, James D. Management of urinary incontinence in  
797 women: summary of updated NICE guidance. *Bmj*. 2013;347.
- 798 52. Hagen S, Glazener C, Cook J, Herbison P, Toozs-Hobson P. Further properties of the  
799 pelvic organ prolapse symptom score: minimally important change and test-retest reliability.  
800 *Neurourol Urodyn*. 2010;29(6):1055-6.
- 801 53. Ge J, Wei X, Zhang H, Fang G. Pelvic floor muscle training in the treatment of pelvic  
802 organ prolapse: A meta-analysis of randomized controlled trials. *Actas Urológicas Españolas*  
803 (English Edition). 2021;45(1):73-82.
- 804 54. Blanchard V, Nyangoh-Timoh K, Fritel X, Fauconnier A, Pizzoferrato A-C. Importance  
805 of a pelvic floor lifestyle program in women with pelvic floor dysfunctions: A pilot study.  
806 *Journal of Gynecology Obstetrics and Human Reproduction*. 2021;50(4):102032.
- 807 55. Wiegersma M, Panman CM, Kollen BJ, Berger MY, Lisman-Van Leeuwen Y, Dekker JH.  
808 Effect of pelvic floor muscle training compared with watchful waiting in older women with  
809 symptomatic mild pelvic organ prolapse: randomised controlled trial in primary care. *Bmj*.  
810 2014;349.
- 811 56. Hagen S, Glazener C, McClurg D, Macarthur C, Elders A, Herbison P, et al. Pelvic floor  
812 muscle training for secondary prevention of pelvic organ prolapse (PREVPROL): a multicentre  
813 randomised controlled trial. *The lancet*. 2017;389(10067):393-402.

- 814 57. Borello-France DF, Handa VL, Brown MB, Goode P, Kreder K, Scheufele LL, et al.  
815 Pelvic-floor muscle function in women with pelvic organ prolapse. *Physical therapy*.  
816 2007;87(4):399-407.
- 817 58. Waterfield AE. *A community study of pelvic floor muscle function in women: Exeter and*  
818 *Plymouth Peninsula Medical School*; 2011.
- 819 59. Child S, Bateman A, Shuttleworth J, Gericke C, Freeman R. Can primary care nurse  
820 administered pelvic floor muscle training (PFMT) be implemented for the prevention and  
821 treatment of urinary incontinence? *A study protocol*. *F1000Research*. 2013;2.
- 822
